# Supplementary material for: Active Components in Digital Health Interventions for Sleep among Adolescents: A Systematic Review and Meta-Analysis of Randomized Controlled Trials
Source: Research Square preprint supplement (doi:10.21203/rs.3.rs-6609677/v1), 2025-05-09
Supplement: Supplementary file 1 [file 42925cd33a7689dd94d5f00e.docx]

**Supplementary file**

**Appendix 1. Searching words**

**Update April 2024**

PubMed (64)

ALL ( "Sleep" )  OR  ( "sleep quality"  OR  "sleep enhance"  OR  "sleep promotion"  OR  "sleep hygiene"  OR  "Sleepefficiency" )  OR  ( "prevention" )OR  ( "Insonmia" )  OR  ( "insomnia" )  AND  ( "digital"  OR  "digital health intervention"  OR  "Digital health"  OR  "e-health"  OR  "electronic-health"  OR  "e-intervention"  OR  "mobile phone"  OR  "smartphone"  OR  "internet"  OR  "internet intervention"  OR  "web-based"  OR  "app"  OR  "application"  OR  "technology assisted" )  AND  ( "Randomized control trial"  OR  "RCT"  OR  "trial"  OR  "randomized clinical trial"  OR  "randomallocation" )  AND  ( "youth"  OR  "adolescents"  OR  "Teen"  OR  "teenager"  OR  "school-Age"  OR  "Pupil" )

Embase (13)

ALL ( "Sleep" )  OR  ( "sleep quality"  OR  "sleep enhance"  OR  "sleep promotion"  OR  "sleep hygiene"  OR  "Sleep efficiency" )  OR  ( "prevention" ) OR  ( "insomnia" )  AND  ( "digital"  OR  "digital health intervention"  OR  "Digital health"  OR  "e-health"  OR  "electronic-health"  OR  "e-intervention"  OR  "mobile phone"  OR  "smartphone"  OR  "internet"  OR  "internet intervention"  OR  "web-based"  OR  "app"  OR  "application"  OR  "technology assisted" )  AND  ( "Randomized control trial"  OR  "RCT"  OR  "trial"  OR  "randomized clinical trial"  OR  "random allocation" )  AND  ( "youth"  OR  "adolescents"  OR  "Teen"  OR  "teenager"  OR  "school-Age"  OR  "Pupil" )

Scopus (336)

ALL ( "Sleep" )  OR  ( "sleep quality"  OR  "sleep enhance"  OR  "sleep promotion"  OR  "sleep hygiene"  OR  "Sleep efficiency" )  OR  ( "insomnia" )  AND  ( "digital"  OR  "digital health intervention"  OR  "Digital health"  OR  "e-health"  OR  "electronic-health"  OR  "e-intervention"  OR  "mobile phone"  OR  "smartphone"  OR  "internet"  OR  "internet intervention"  OR  "web-based"  OR  "app"  OR  "application"  OR  "technology-assisted" )  AND  ( "Randomized control trial"  OR  "RCT"  OR  "trial"  OR  "randomized clinical trial"  OR  "random allocation" )  AND  ( "youth"  OR  "adolescents"  OR  "Teen"  OR  "teenager"  OR  "school-Age"  OR  "Pupil" )

OVID MEDLINE 13

(Sleep* OR "sleep quality*" OR "sleep enhance*" OR "sleep promotion*" OR "sleep hygiene*" OR "sleep hygiene*" OR ‘prevention’ OR "insomnia*" AND ("digital*" OR "digital health intervention*" OR "digital health*" OR "e-health*" OR "electronic-health*" OR "e-intervention*" OR "mobile phone*" OR "smartphone*" OR "internet*" OR "internet intervention*") AND (Randomized control trial* OR "RCT*" OR "trial*" OR "randomized clinical trial*" OR "random allocation*") AND "(youth* OR “adolescents*" OR "Teen*" OR "teenager*" OR "school-Age*" OR "Pupil*").

CINAHL (30)

(SU Subject terms) Sleep OR sleep quality OR sleep enhance OR sleep promotion OR sleep hygiene OR sleep hygiene OR prevention OR insomnia or sleep deprivation or sleep disturbance or reduced sleep or sleep loss or lack of sleep, AND(TX all) digital OR digital health intervention OR digital health OR e-health OR electronic-health OR e-intervention OR mobile phone OR smartphone OR internet OR internet intervention OR online AND (TI Title) Randomized control trial OR RCT OR trial OR randomized clinical trial OR random allocation AND (TXT all) (youth OR young adult OR adolescents OR Teen OR teenager OR school-Age OR Pupil).

PSYINFO (22) April 4.2024

((Sleep* OR "sleep quality*" OR "sleep enhance*" OR "sleep promotion*" OR "sleep hygiene*" OR "sleep hygiene*" OR “prevention” OR “treatment” OR "insomnia*")) AND ((digital* OR "digital health intervention*" OR "digital health*" OR "e-health*" OR "electronic-health*" OR "e-intervention*" OR "mobile phone*" OR "smartphone*" OR "internet*" OR "internet intervention*")) AND ((Randomized control trial* OR "RCT*" OR "trial*" OR "randomized clinical trial*" OR "random allocation*")) AND ((youth* OR "adolescents*" OR "Teen*" OR "teenager*" OR "school-Age*" OR "Pupil*"))

**Web of Science (80) - 124**

(((((((((((((((((((((((((((((TS=(sleep)) OR TS=(sleep quality)) OR TS=(sleep enhance)) OR TS=(Sleep hygiene)) OR TS=(sleep promotion)) OR TS=(insomnia)) AND TS=(digital)) OR TS=(digital health intervention)) OR TS=(digital health)) OR TS=(e-health)) OR TS=(electronic-health)) OR TS=(e-intervention)) OR TS=(mobile phone)) OR TS=(mHealth)) OR TS=(smartphone)) OR TS=(internet)) OR TS=(internet intervention)) OR TS=(online)) AND TS=(Randomized control trial)) OR TS=(RCT)) OR TS=(trial))) OR TS=(randomized clinical trial)) OR TS=(random allocation)) AND TS=(youth)) OR TS=(adolescents)) OR TS=(teen)) OR TS=(teenager)) OR TS=(school-Age)) OR TS=(Pupil)

**Appendix 2: Data extraction form**

**GENERAL INFORMATION**

| **Title of the paper:**  **First author name:**  **Year:**  **Lead author's contact details:**  **Journal name:** |
| --- |

**CHARACTERISTICS OF INCLUDED STUDIES**

| **Health domain** (e.g., insomnia, healthy lifestyle):  **Country** in which the study was conducted (**Select the options**):  Australia  China  The Netherlands  U.S  U.K  Other:   |  | | --- |   **Type of intervention (Select the options)**  mHealth (Mobile health intervention)  eHealth (Website intervention/ internet intervention)  both (Include both types of interventions described above)  Other (e.g. MSM, chat, VR) (describe):   |  | | --- | |
| --- | --- | --- |

**METHOD**

| **Aim of the study:**   |  | | --- |   **Study design** (e.g., RCT 2 arms, cluster RCT):   |  | | --- |   **Type of control group** (e.g., active control group, treatment as usual, face-to-face, waiting list, mixed) **– Please describe.**   |  | | --- |   **Primary Measures** (including questionnaires for sleep or objective trackers reported [e.g. actigraphy]):   |  | | --- |   **Secondary Measures (**e.g.,Questionnaires or objective trackers reported for sleep or mental health)   |  | | --- |   **Other measures (**e.g.,Questionnaires or objective trackers reported for other health conditions)   |  | | --- |  - **Participants** [Sociodemographic characteristics and target population)   **Age** (mean age, (SD) range)   |  | | --- |   **Gender** (Female= n, %, male=n, %, binary/ others)   |  | | --- |   **Other sociodemographic characteristics:**   |  | | --- |   **Type of sample** (e.g., general population, school-based, specific clinical)   |  | | --- |   **Method of recruitment** (Select the options)   | Phone  Mail  Clinic patients  Voluntary  Other (e.g. school-based) describe.   |  | | --- | | | --- | --- |   **Inclusion criteria**   |  | | --- |   **Exclusion criteria**   |  | | --- |   **Total number of participants recruited**.   |  | | --- |     **Analytical sample** (Number of participants included for the final analysis)   |  | | --- |   **Interventions**  **Characteristics (e.g., website+ mobile phone+ face-to-face)**   |  | | --- |   **Frequency** (Select the options):   | Daily  Weekly  Monthly  Other, describe.   |  | | --- | | | --- | --- |   **Context intervention** (e.g., healthcare, school-based, general population   |  | | --- |  - **Intervention and comparisons**   **Active components** (e.g., component description of Cognitive Behavioral Therapy (CBT) for insomnia [behavioural and cognitive components] [e.g., SH: Sleep Hygiene SC: Stimulus Control, SR: sleep restriction, RT: relaxation techniques PE: psychoeducation, CT: cognitive technique]   |  | | --- |   **Other active components**  (positive psychology/ Behavioral Change Techniques [BCT](taxonomy)/ healthy lifestyle components] (components reported in the paper)   |  | | --- |   **Level of guidance (select)**   | **Unguided** (Automatic intervention, including chatbot, app, website)  Provide a description.   |  | | --- |   **Guided** (Human support, including live chat, asynchrony message, videoconference, face-to-face)  Provide a description.   |  | | --- |   **Both**  Provide a description.   |  | | --- |   **No reported** | | --- | --- | --- | --- | |
| --- | --- | --- | --- | --- | --- | --- | --- | --- | --- | --- | --- | --- | --- | --- | --- | --- | --- | --- | --- | --- | --- | --- | --- | --- | --- | --- |

**RESULTS**

| **Analytical strategy (**select**)**  **Per-protocol**  **Intention to treat.**  **Both**  **Others: Describe**   |  | | --- |   **Digital literacy participants (**Reports on digital literacy participants (if any, are provided by the authors)   |  | | --- | |
| --- | --- | --- |

**Effectiveness** (Main results concerning overall effectiveness)

|  |
| --- |

**Outcome table (time point sleep)** Quantitative outcomes on sleep only

| Intervention | Mean (SD) pre-test | Mean (SD) post-test | Effect size (Within groups) (e.g., Cohen's d, Pearson's r) | Effect size (Between groups) (e.g., Cohen's d, Pearson's r) |
| --- | --- | --- | --- | --- |
| Intervention 1 |  |  |  |  |
| Intervention 2 |  |  |  |  |
| Intervention 3 |  |  |  |  |

Notes (other analysis, statistical reports):

| Std. Mean Difference |
| --- |

**Drop-out and/or attrition** (report from the paper)

|  |
| --- |

**Dose definition and report by the authors (Intention to use).**

|  |
| --- |

**Clinically significant analysis** (sleep and other measures, if any)

|  |
| --- |

**Main results concerning active components linked to adherence/intended use (RQ2)**

|  |
| --- |

**Main results concerning the effect of intervention adherence/intended use on sleep (RQ3)**

|  |
| --- |

**LIMITATIONS**

**Main limitations reported.**

**Study funding sources.**

|  |
| --- |

**Possible conflicts of interest for study authors**

|  |
| --- |

**Appendix 3: Quality Assessment Tool for Quantitative Studies**


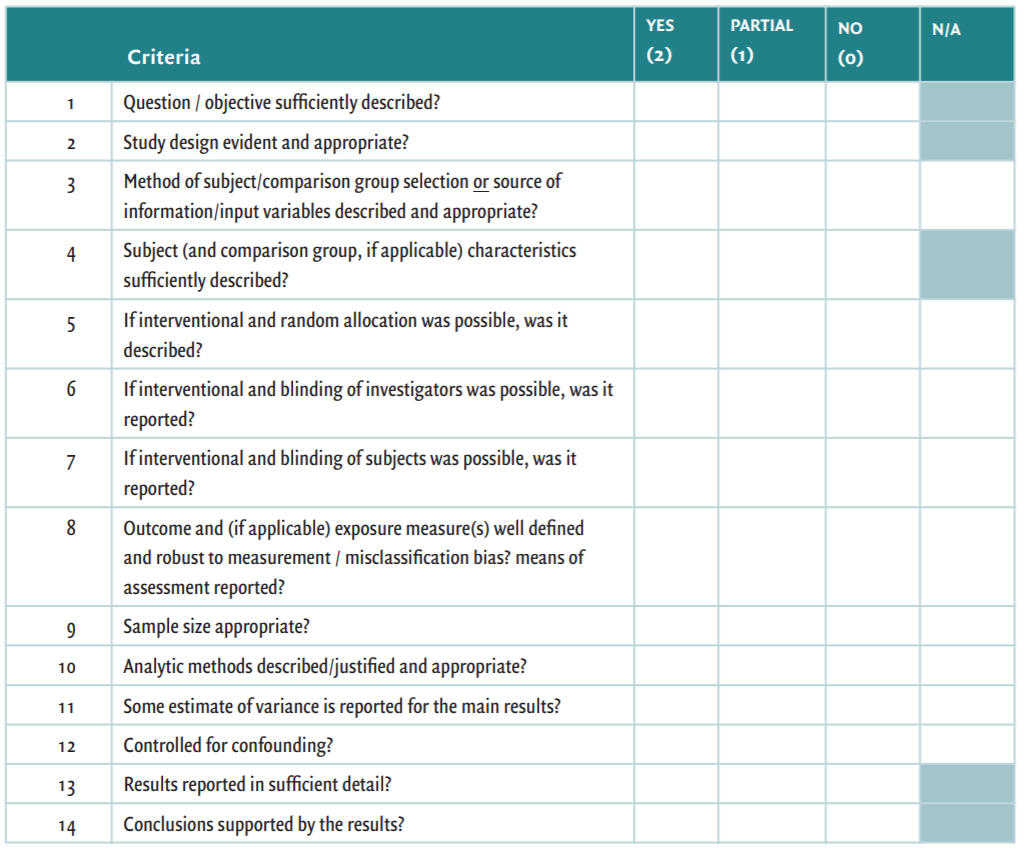


Leanne M. Kmet, R. C. L. L. S. C. (2004). STANDARD QUALITY ASSESSMENT CRITERIA for Evaluating Primary Research Papers from a Variety of Fields. from Alberta Heritage Foundation for Medical Research

**Appendix 4. Study quality scores**

|  | Random Sequence Generation (Selection Bias) | Allocation Concealment (Selection Bias) | Blinding of Participants | Blinding of Outcome Assessment (Detection Bias) | Incomplete Outcome Data (Attrition Bias) | Selective Reporting (Reporting Bias) |
| --- | --- | --- | --- | --- | --- | --- |
| Morris et al. 2015 | + | + | + | + | + | ? |
| Freeman et al. 2017 | + | + | + | + | ? | + |
| De Bruin et al. 2018 | + | + | + | + | + | + |
| Chan, et al. 2022 | + | + | ? | + | + | + |
| Champion, et al 2023 | + | + | + | + | + | + |
| Werner‐Seidler, et al 2023 | + | + | + | + | + | + |

(+), (−), and (?) indicate that the study presented low, high, or unclear bias in their applied method, respectively.
